# Supplementary material for: Tracing the invertebrate herpesviruses in the global sequence datasets
Source: Frontiers journal article supplement (doi:10.3389/fmars.2023.1159754), 2023-07-14
Supplement: Table_1.xlsx [file Table_1.xlsx]

## Sheet: Foglio1
Supplementary Table 1. Search of ‘Malacoherpesviridae’ reads in the SRA database. Study title, run accession ID, total spots, total sequenced bases and the number of identified malacoherpescirs reads are reported. Green = DNA-seq, Blue= RNA-seq, red= samples includung malacoherpesvirus reads with unknown origin. For the latter samples, the reads have been mapped on the reference genome declared i…
Title	run_accession	run_total_spots	run_total_bases	No. of malacoherpesvirus spots (STAT)	Reference genome ID (used for mapping)	Reads mapped on the reference genome (%)	No. of contigs assembled from the unmapped reads	No. of contigs identified as 'malacoherpesvirus'	Length of the viral genome (concatenated contigs)	No. of reads back-mapped on the malacoherpesvirus contigs
Direct genome sequencing of Haliotid herpesvirus 1 from infected tissues	SRR13092000	29105023	8731506900	25468551
Genetic diversity and connectivity of the Ostreid herpesvirus 1 populations in France: a first attempt to phylogeographic inference for a marine mollusc disease	SRR13169044	64788691	19566184682	8741449
Genetic diversity and connectivity of the Ostreid herpesvirus 1 populations in France: a first attempt to phylogeographic inference for a marine mollusc disease	SRR13169039	165758533	49727559900	7591472
Ostreid herpesvirus 1 genome sequencing	SRR6917575	21569739	3235460850	7213335
Genetic diversity and connectivity of the Ostreid herpesvirus 1 populations in France: a first attempt to phylogeographic inference for a marine mollusc disease	SRR13169046	54808191	16552073682	5166534
Genetic diversity and connectivity of the Ostreid herpesvirus 1 populations in France: a first attempt to phylogeographic inference for a marine mollusc disease	SRR13169038	591054792	177316437600	5063257
Genetic diversity and connectivity of the Ostreid herpesvirus 1 populations in France: a first attempt to phylogeographic inference for a marine mollusc disease	SRR13169030	27171364	8151409200	4325361
Enrichment by MicrobEnrich, followed by depletion for oyster and bacterial rRNAs using custom primers (Nugen technology)	SRR13480672	86959120	26261654240	4322074
Genetic diversity and connectivity of the Ostreid herpesvirus 1 populations in France: a first attempt to phylogeographic inference for a marine mollusc disease	SRR13169033	116465805	34939741500	4315598
Enrichment by MicrobEnrich, followed by depletion for oyster and bacterial rRNAs using custom primers (Nugen technology)	SRR13480657	53848885	16262363270	3785704
Enrichment by MicrobEnrich, followed by depletion for oyster and bacterial rRNAs using custom primers (Nugen technology)	SRR13480673	97867411	29360223300	3738658
Enrichment by MicrobEnrich, followed by depletion for oyster and bacterial rRNAs using custom primers (Nugen technology)	SRR13480671	67900923	20506078746	3389556
Enrichment by MicrobEnrich, followed by depletion for oyster and bacterial rRNAs using custom primers (Nugen technology)	SRR13480664	61944242	18707161084	3152108
Genetic diversity and connectivity of the Ostreid herpesvirus 1 populations in France: a first attempt to phylogeographic inference for a marine mollusc disease	SRR13169049	91076828	27505202056	3055617
Ostreid herpesvirus 1 genome sequencing	SRR6917578	2117558	1058779000	3043460
Enrichment by MicrobEnrich, followed by depletion for oyster and bacterial rRNAs using custom primers (Nugen technology)	SRR13480660	76803224	23194573648	2779330
Transcriptomic sequencing of Haliotis diversicolor	SRR7160774	2179981	1089990500	2730884
Raw sequence reads of Blood-microbiota of the Pacific oyster Crassostrea gigas	SRR7339945	3025983		2693295
Enrichment by MicrobEnrich, followed by depletion for oyster and bacterial rRNAs using custom primers (Nugen technology)	SRR13480658	63478412	19170480424	2684293
Genetic diversity and connectivity of the Ostreid herpesvirus 1 populations in France: a first attempt to phylogeographic inference for a marine mollusc disease	SRR13169040	237029069	71108720700	2672417
Genetic diversity and connectivity of the Ostreid herpesvirus 1 populations in France: a first attempt to phylogeographic inference for a marine mollusc disease	SRR13169036	293709702	88700330004	2653122
Enrichment by MicrobEnrich, followed by depletion for oyster and bacterial rRNAs using custom primers (Nugen technology)	SRR13480679	110140743	33042222900	2637883
Enrichment by MicrobEnrich, followed by depletion for oyster and bacterial rRNAs using custom primers (Nugen technology)	SRR13480678	129574997	38872499100	2555536
PacBio transcriptomic sequencing of Scapharca broughtonii infected with Ostreid herpesvirus 6	SRR11612705	9017377	2272379004	2504461
Genetic diversity and connectivity of the Ostreid herpesvirus 1 populations in France: a first attempt to phylogeographic inference for a marine mollusc disease	SRR13169042	75861947	22910307994	2443965
Genetic diversity and connectivity of the Ostreid herpesvirus 1 populations in France: a first attempt to phylogeographic inference for a marine mollusc disease	SRR13169043	58929464	17796698128	2413167
Raw sequence reads of Blood-microbiota of the Pacific oyster Crassostrea gigas	SRR7339954	3025983	1362508468	2287830
Genetic diversity and connectivity of the Ostreid herpesvirus 1 populations in France: a first attempt to phylogeographic inference for a marine mollusc disease	SRR13169047	63631679	19216767058	2243497
Enrichment by MicrobEnrich, followed by depletion for oyster and bacterial rRNAs using custom primers (Nugen technology)	SRR13480666	75215750	22715156500	2206834
Enrichment by MicrobEnrich, followed by depletion for oyster and bacterial rRNAs using custom primers (Nugen technology)	SRR13480680	121916417	36574925100	2172877
PacBio transcriptomic sequencing of Scapharca broughtonii infected with Ostreid herpesvirus 5	SRR11612703	7799605	1965500460	2127193
Transcriptomic sequencing of Haliotis diversicolor	SRR7160773	3131613	939483900	2027782
Ostreid herpesvirus 1 genome sequencing	SRR6917573	25187818	3778172700	2021237
Genetic diversity and connectivity of the Ostreid herpesvirus 1 populations in France: a first attempt to phylogeographic inference for a marine mollusc disease	SRR13169045	71481733	21587483366	1963430
Ostreid herpesvirus 1 genome sequencing	SRR6917580	7507283	2252184900	1944974
Ostreid herpesvirus 1 genome sequencing	SRR6917579	2113866	1056933000	1944388
Genetic diversity and connectivity of the Ostreid herpesvirus 1 populations in France: a first attempt to phylogeographic inference for a marine mollusc disease	SRR13169029	28376028	8512808400	1904953
Enrichment by MicrobEnrich, followed by depletion for oyster and bacterial rRNAs using custom primers (Nugen technology)	SRR13480685	115156579	34546973700	1890623
Enrichment by MicrobEnrich, followed by depletion for oyster and bacterial rRNAs using custom primers (Nugen technology)	SRR13480656	67222280	20301128560	1862279
Genetic diversity and connectivity of the Ostreid herpesvirus 1 populations in France: a first attempt to phylogeographic inference for a marine mollusc disease	SRR13169037	280401158	84681149716	1824158
Ostreid herpesvirus 1 genome sequencing	SRR6917577	25136450	3770467500	1783332
Divergence and plasticity shape adaptive potential in the Pacific oyster	SRR6062979	10631203	520928947	1755456
Enrichment by MicrobEnrich, followed by depletion for oyster and bacterial rRNAs using custom primers (Nugen technology)	SRR13480659	75765664	22881230528	1727464
Ostreid herpesvirus 1 genome sequencing	SRR6917574	24067794	3610169100	1725164
PacBio transcriptomic sequencing of Scapharca broughtonii infected with Ostreid herpesvirus 7	SRR11612706	9912632	2497983264	1717686
Transcriptomic sequencing of Haliotis diversicolor	SRR7160772	1933357	966678500	1679753
Genetic diversity and connectivity of the Ostreid herpesvirus 1 populations in France: a first attempt to phylogeographic inference for a marine mollusc disease	SRR13169041	62447855	18859252210	1596097
Raw sequence reads of Blood-microbiota of the Pacific oyster Crassostrea gigas	SRR7339946	1880436		1532452
Enrichment by MicrobEnrich, followed by depletion for oyster and bacterial rRNAs using custom primers (Nugen technology)	SRR13480665	60832753	18371491406	1517167
Genetic diversity and connectivity of the Ostreid herpesvirus 1 populations in France: a first attempt to phylogeographic inference for a marine mollusc disease	SRR13169032	31704332	9511299600	1507039
Enrichment by MicrobEnrich, followed by depletion for oyster and bacterial rRNAs using custom primers (Nugen technology)	SRR13480652	73587723	22223492346	1472678
Experimental design : natural infection of oyster by OshV-1, DNA extraction : QIAamp DNA Mini Kit (Qiagen), library preparation : TrueSeq DNA PCR-free kit	SRR14210288	104461760	31338528000	1407637
Experimental design : natural infection of oyster by OshV-1, DNA extraction : QIAamp DNA Mini Kit (Qiagen), library preparation : TrueSeq DNA PCR-free kit	SRR14210307	96066037	28819811100	1194029
PacBio transcriptomic sequencing of Scapharca broughtonii infected with Ostreid herpesvirus 10	SRR11612709	7556428	1904219856	1173217
Genetic diversity and connectivity of the Ostreid herpesvirus 1 populations in France: a first attempt to phylogeographic inference for a marine mollusc disease	SRR13169048	59717383	18034649666	1078634
CG1	ERR498201			999376
AF11-T60-R3-RNAseq	SRR6679058	99265895	17867861100	977716
PacBio transcriptomic sequencing of Scapharca broughtonii infected with Ostreid herpesvirus 1	SRR11612666	8257514	2080893528	870534
PacBio transcriptomic sequencing of Scapharca broughtonii infected with Ostreid herpesvirus 2	SRR11612667	8488187	2139023124	864572
Enrichment by MicrobEnrich, followed by depletion for oyster and bacterial rRNAs using custom primers (Nugen technology)	SRR13480667	72066543	21764095986	858527
Raw sequence reads of Blood-microbiota of the Pacific oyster Crassostrea gigas	SRR7339973	1526675	693476541	853035
Genetic diversity and connectivity of the Ostreid herpesvirus 1 populations in France: a first attempt to phylogeographic inference for a marine mollusc disease	SRR13169035	32757220	57436992657	843427
Enrichment by MicrobEnrich, followed by depletion for oyster and bacterial rRNAs using custom primers (Nugen technology)	SRR13480684	120333720	36100116000	741714
AF11-T60-R3-RNAseq	SRR6679056	93818694	16887364920	730224
Genetic diversity and connectivity of the Ostreid herpesvirus 1 populations in France: a first attempt to phylogeographic inference for a marine mollusc disease	SRR13169034	118344456	35503336800	693342
AF11-T60-R3-RNAseq	SRR6679057	113483828	20427089040	680723
PacBio transcriptomic sequencing of Scapharca broughtonii infected with Ostreid herpesvirus 8	SRR11612707	7508341	1892101932	673597
Raw sequence reads of Blood-microbiota of the Pacific oyster Crassostrea gigas	SRR7339966	2547766	1180184481	666538
ribo2	SRR7637587	1345294	602318652	533005
AF11-T60-R3-RNAseq	SRR6679059	35736699	6432605820	519103
AF11-T60-R3-RNAseq	SRR6679061	43023231	7744181580	509578
AF11-T60-R3-RNAseq	SRR6679053	96091731	17296511580	465347
S15_poly	SRR8237210	25992104	7095353986	454787
Genetic diversity and connectivity of the Ostreid herpesvirus 1 populations in France: a first attempt to phylogeographic inference for a marine mollusc disease	SRR13169031	28090544	8427163200	452148
IFREMER 0-90	SRR10867532	30163397	9018863940	443128
PacBio transcriptomic sequencing of Scapharca broughtonii infected with Ostreid herpesvirus 9	SRR11612708	7799327	1965430404	397946
Transcriptome of Crassostrea gigas infected by OsHV-1 at high temperatures	SRR11285550	22048393	3307258950	394107
Raw sequence reads of Blood-microbiota of the Pacific oyster Crassostrea gigas	SRR7339972	1006976	438923919	364574
RNA-seq of Pacific oyster Crassostrea gigas under different developmental stages and stress treatments	SRR334249	12192958	865700018	362993
IFREMER 0-77	SRR10867514	12700569	24539175858	341883
PacBio transcriptomic sequencing of Haliotis diversicolor supertexta infecting with Haliotid herpesvirus 10	SRR10566450			332240
IFREMER 0-136	SRR10867642	30321512	4548226800	325460
IFREMER 0-92	SRR10867537	24331190	3649678500	324493
IFREMER 0-82	SRR10867520	23020341	6883006158	313013
IFREMER 0-135	SRR10867641	24670607	3700591050	305373
IFREMER 0-137	SRR10867643	24613938	3692090700	298107
PacBio transcriptomic sequencing of Haliotis diversicolor supertexta infecting with Haliotid herpesvirus 14	SRR10566454	12997664	2500000000	296370
IFREMER 0-107	SRR10867594	23177950	3476692500	285070
IFREMER 0-104	SRR10867590	27122467	4068370050	280971
PacBio transcriptomic sequencing of Haliotis diversicolor supertexta infecting with Haliotid herpesvirus 8	SRR10566448			280530
IFREMER 0-79	SRR10867516	22861952	6837748338	269475
PacBio transcriptomic sequencing of Scapharca broughtonii infected with Ostreid herpesvirus 13	SRR11612712	8985999	449239616	260803
IFREMER 0-93	SRR10867538	25204368	3780655200	257362
IFREMER 0-89	SRR10867531	27026588	8070176114	243457
IFREMER 0-83	SRR10867521	23761309	7097920970	242297
IFREMER 0-78	SRR10867515	13725932	19678384429	241474
IFREMER 0-88	SRR10867530	25935401	7751828596	234551
PacBio transcriptomic sequencing of Haliotis diversicolor supertexta infecting with Haliotid herpesvirus 11	SRR10566451			230141
AF11-T60-R3-RNAseq	SRR6679087	28521831	4278274650	227270
IFREMER 0-101	SRR10867587	26514802	3977220300	224335
PacBio transcriptomic sequencing of Haliotis diversicolor supertexta infecting with Haliotid herpesvirus 13	SRR10566453			224157
PacBio transcriptomic sequencing of Haliotis diversicolor supertexta infecting with Haliotid herpesvirus 12	SRR10566452			221114
IFREMER 0-114	SRR10867601	28564137	4284620550	220687
IFREMER 0-96	SRR10867581	28060540	4209081000	219262
IFREMER 0-108	SRR10867595	28048520	4207278000	215017
IFREMER 0-97	SRR10867583	27194296	4079144400	213829
Transcriptomic sequencing of Haliotis diversicolor	SRR8439317	18760709	5628212700	200224
PacBio transcriptomic sequencing of Haliotis diversicolor supertexta infecting with Haliotid herpesvirus 3	SRR10566439			199424
IFREMER 0-112	SRR10867599	27725214	4158782100	198207
IFREMER 0-84	SRR10867522	28179118	8414605828	196794
PacBio transcriptomic sequencing of Haliotis diversicolor supertexta infecting with Haliotid herpesvirus 7	SRR10566447			181663
IFREMER 0-117	SRR10867605	24280545	3642081750	152311
IFREMER 0-121	SRR10867609	24633081	3694962150	151221
IFREMER 0-131	SRR10867633	25845203	3876780450	150128
Transcriptome of Crassostrea gigas infected by OsHV-1 at high temperatures	SRR11285552	27700446	4155066900	148550
IFREMER 0-98	SRR10867584	26692753	4003912950	147821
IFREMER 0-103	SRR10867589	24249934	3637490100	146593
IFREMER 0-102	SRR10867588	22660338	3399050700	143970
RNA-seq of Pacific oyster Crassostrea gigas under different developmental stages and stress treatments	SRR334340	11686407	572633943	138659
IFREMER 0-100	SRR10867586	26696908	4004536200	136561
IFREMER 0-94	SRR10867579	27033777	4055066550	132726
IFREMER 0-134	SRR10867640	29289491	4393423650	131799
RNA-seq of Pacific oyster Crassostrea gigas under different developmental stages and stress treatments	SRR334250	10280110	729887810	127838
IFREMER 0-116	SRR10867603	28252562	4237884300	120640
IFREMER 0-120	SRR10867608	29581348	4437202200	114713
IFREMER 0-99	SRR10867585	26696908	4004536200	113231
IFREMER 0-113	SRR10867600	26928202	4039230300	108642
Transcriptome of Crassostrea gigas infected by OsHV-1 at high temperatures	SRR11285556	27593280	4138992000	108377
IFREMER 0-132	SRR10867634	25382187	3807328050	107303
IFREMER 0-95	SRR10867580	29605377	4440806550	105324
IFREMER 0-118	SRR10867606	18583437	2787515550	95919
IFREMER 0-119	SRR10867607	29897556	4484633400	92777
PacBio transcriptomic sequencing of Haliotis diversicolor supertexta infecting with Haliotid herpesvirus 1	SRR10566437			87701
AF11-T60-R3-RNAseq	SRR6679085	29457835	4418675250	85594
AF11-T60-R3-RNAseq	SRR6679084	29569759	4435463850	84762
Transcriptomic sequencing of Scapharca broughtonii	SRR7012356	163482	2195171755	76458
IFREMER 0-145	SRR10867658	24654458	3698168700	68151
Ostreid herpesvirus 1 Genome sequencing and assembly	SRR5936879	20453692	1002230908	67805
PacBio genome sequencing of Haliotid herpesvirus 1	SRR7892517	163482	5027221839	67662
PacBio transcriptomic sequencing of Scapharca broughtonii infected with Ostreid herpesvirus 11	SRR11612710	11408459	570348553	67277
IFREMER 0-109	SRR10867596	28851066	4327659900	66774
Semi-synthetic marine metagenomes for metagenomic pipeline assessment	ERR1992810			66375
Transcriptome of Crassostrea gigas infected by OsHV-1 at high temperatures	SRR11285549	27497034	4124555100	65467
Transcriptomic sequencing of Haliotis diversicolor	SRR8439322	23224873	6967461900	59246
Transcriptome of Crassostrea gigas infected by OsHV-1 at high temperatures	SRR11285544	25910532	3886579800	55992
Sockeye salmon genome assembly and annotation	SRR9025763	331724833	165862416500	54705	GCA_006149115.2	85.7	230805	24	97430	61668
PacBio transcriptomic sequencing of Scapharca broughtonii infected with Ostreid herpesvirus 12	SRR11612711	9530497	476460523	54113
PacBio transcriptomic sequencing of Haliotis diversicolor supertexta infecting with Haliotid herpesvirus 2	SRR10566438			53235
IFREMER 0-87	SRR10867526	29926948	8942015222	47274
Ostreid herpesvirus 1 genome sequencing	SRR6917576	30057463	4508619450	46962
Gill transcriptome sequencing of Crassostrea gigas after OsHV-1 challenge	SRR2002949			46068
IFREMER 0-133	SRR10867635	26226243	3933936450	44985
PacBio transcriptomic sequencing of Haliotis diversicolor supertexta infecting with Haliotid herpesvirus 9	SRR10566449			41265
IFREMER 0-105	SRR10867591	24688449	3703267350	38413
IFREMER 0-111	SRR10867598	25459279	3818891850	35219
IFREMER 0-129	SRR10867618	19062747	2859412050	32369
Transcriptome of Crassostrea gigas infected by OsHV-1 at high temperatures	SRR11285551	23623200	3543480000	31700
Transcriptome of Crassostrea gigas infected by OsHV-1 at high temperatures	SRR11285560	24454883	3668232450	31623
Transcriptome of Crassostrea gigas infected by OsHV-1 at high temperatures	SRR11285561	27294961	4094244150	31108
IFREMER 0-110	SRR10867597	27455810	4118371500	29973
IFREMER 0-106	SRR10867592	24360621	3654093150	25817
Gill transcriptome sequencing of Crassostrea gigas after OsHV-1 challenge	SRR2002941	23927225	1807499292	24574
PacBio genome sequencing of Haliotid herpesvirus 0	SRR7892515			24482
IFREMER 0-146	SRR10867659	28772319	4315847850	22898
IFREMER 0-73	SRR10867508	42667628	4352098056	22847
IFREMER 0-123	SRR10867611	26684570	4002685500	22348
PacBio genome sequencing of Haliotid herpesvirus 2	SRR7892513			22202
Direct genome sequencing of Haliotid herpesvirus 1 from infected tissues	SRR13091995	30139294	9041788200	21871
IFREMER 0-143	SRR10867653	26680182	4002027300	21853
PacBio genome sequencing of Haliotid herpesvirus 1	SRR7892514			21164
Divergence and plasticity shape adaptive potential in the Pacific oyster	SRR6063108	3702057	2228638314	19570
Kazakh cattle and Xinjiang brown cattle Raw sequence reads	SRR8893820	64308992	19256236120	19312	ARS-UCD1.2	96.2	28517	82	162375	42728
IFREMER 0-128	SRR10867617	24547132	3682069800	18465
RNA-seq of Pacific oyster Crassostrea gigas under different developmental stages and stress treatments	SRR334257	9476922	672861462	17382
IFREMER 0-115	SRR10867602	24488962	3673344300	15047
Gill transcriptome sequencing of Crassostrea gigas after OsHV-1 challenge	SRR2002947	41960833	2056080817	13598
Raw sequence reads of Blood-microbiota of the Pacific oyster Crassostrea gigas	SRR7339965	1764663	689163562	12898
RNA-seq of Pacific oyster Crassostrea gigas under different developmental stages and stress treatments	SRR334248	14353878	1019125338	12499
IFREMER 0-140	SRR10867646	23267134	3490070100	12378
Kazakh cattle and Xinjiang brown cattle Raw sequence reads	SRR8893823	61776853	18474553962	12313	ARS-UCD1.2	96	24491	129	163939	28829
AF11-T60-R3-RNAseq	SRR6679068	27248370	4087255500	10147
IFREMER 0-139	SRR10867645	26976854	4046528100	9551
Crassostrea gigas transcriptomic and proteomic data during metamorphosis	SRR11364062	7026110	1770579720	8470
PacBio transcriptomic sequencing of Haliotis diversicolor supertexta infecting with Haliotid herpesvirus 5	SRR10566441			8379
RNA-seq of Pacific oyster Crassostrea gigas under different developmental stages and stress treatments	SRR334258	10353569	507324881	7530
IFREMER 0-91	SRR10867534	23663693	3549553950	7253
Cleistogenes songorica RNA sequencing	SRR11829152	29454844	45906280081	7194	not available		112542	229	141875	12098
IFREMER 0-127	SRR10867616	24141402	3621210300	7191
Cleistogenes songorica RNA sequencing	SRR11829153	27514985	38178785130	7150	not available		221066	232	147891	12770
Transcriptomic sequencing of Haliotis diversicolor	SRR8439321	23206856	6962056800	7090
RNA-seq of Pacific oyster Crassostrea gigas under different developmental stages and stress treatments	SRR334261	26648356	1305769444	6941
PacBio transcriptomic sequencing of Haliotis diversicolor supertexta infecting with Haliotid herpesvirus 4	SRR10566440			5971
Cleistogenes songorica RNA sequencing	SRR11829151	10964092	537240508	5649	not available		113142	250	150339	10389
RNA-seq of Pacific oyster Crassostrea gigas under different developmental stages and stress treatments	SRR334251	7529327	534582217	5331
Cleistogenes songorica RNA sequencing	SRR11829148	11338974	566873107	5308	not available		217805	237	145281	9716
IFREMER 0-138	SRR10867644	26206714	3931007100	5079
RNA-seq of Pacific oyster Crassostrea gigas under different developmental stages and stress treatments	SRR334256	7179625	509753375	5016
Cleistogenes songorica RNA sequencing	SRR11829149	10626479	531254620	4871	not available		209276	255	140568	8393
IFREMER 0-144	SRR10867657	24378295	3656744250	4844
Divergence and plasticity shape adaptive potential in the Pacific oyster	SRR6063446	97600897	17568161460	4745
Cleistogenes songorica RNA sequencing	SRR11829150	10991571	538586979	4673	not available		111539	262	143320	8495
IFREMER 0-141	SRR10867651	27098147	4064722050	4615
IFREMER 0-122	SRR10867610	24192645	3628896750	4193
Transcriptome of Crassostrea gigas infected by OsHV-1 at high temperatures	SRR11285537	28117174	4217576100	4079
Gill transcriptome sequencing of Crassostrea gigas after OsHV-1 challenge	SRR2002948	67021310	20031519660	3946
PacBio transcriptomic sequencing of Haliotis diversicolor supertexta infecting with Haliotid herpesvirus 6	SRR10566442			3927
IFREMER 0-124	SRR10867612	26203761	3930564150	3868
Transcriptome of Crassostrea gigas infected by OsHV-1 at high temperatures	SRR11285540	27365228	4104784200	3563
AF11-T60-R3-RNAseq	SRR6679064	24122440	3618366000	3281
Platysternon megacephalum Raw sequence reads (both DNA and RNA) about genome assembly and annotation	SRR7647061	27067348	6646323588	3039	QXTE00000000.1	98.9	655127	161	146504	6012
Crassostrea gigas transcriptomic and proteomic data during metamorphosis	SRR11364039	28178982	4226847300	2932
Platysternon megacephalum Raw sequence reads (both DNA and RNA) about genome assembly and annotation	SRR7647062	61264200	18379260000	2922	QXTE00000000.1	99	637671	165	145681	5695
IFREMER 0-142	SRR10867652	25330100	3799515000	2908
Platysternon megacephalum Raw sequence reads (both DNA and RNA) about genome assembly and annotation	SRR7647072	56541952	16962585600	2899	QXTE00000000.1	98.9	707492	173	138480	5356
Gill transcriptome sequencing of Crassostrea gigas after OsHV-1 challenge	SRR2002940	10054430		2785
Crassostrea gigas transcriptomic and proteomic data during metamorphosis	SRR11364043	7973934	2009431368	2684
PacBio transcriptomic sequencing of Scapharca broughtonii infected with Ostreid herpesvirus 4	SRR11612693	8841265	2227998780	2564
IFREMER 0-125	SRR10867613	27907704	4186155600	2427
Crassostrea gigas transcriptomic and proteomic data during metamorphosis	SRR11364063	8194498	2065013496	2179
Divergence and plasticity shape adaptive potential in the Pacific oyster	SRR6063186	106440722	19159329960	2052
IFREMER 0-86	SRR10867525	27759436	8293649200	1961
Raw sequence reads of Blood-microbiota of the Pacific oyster Crassostrea gigas	SRR7339975	1031656	476952163	1912
RNA-seq of Pacific oyster Crassostrea gigas under different developmental stages and stress treatments	SRR334260	24245408	1188024992	1722
Crassostrea gigas microbiota and pathobiota	SRR9033546	3692160	1384833164	1668
Transcriptome of Crassostrea gigas infected by OsHV-1 at high temperatures	SRR11285546	26028034	3904205100	1585
Transcriptomic sequencing of Haliotis diversicolor	SRR8439318	29023539	8707061700	1567
Crassostrea gigas transcriptomic and proteomic data during metamorphosis	SRR11364038	24383887	3657583050	1560
IFREMER 0-74	SRR10867509	306385019	76596254750	1519
Divergence and plasticity shape adaptive potential in the Pacific oyster	SRR6063117	96131702	17303706360	1454
Crassostrea gigas transcriptomic and proteomic data during metamorphosis	SRR11364041	26317492	3947623800	1427
Gill transcriptome sequencing of Crassostrea gigas after OsHV-1 challenge	SRR2002942	25859546	1953409968	1424
Platysternon megacephalum Raw sequence reads (both DNA and RNA) about genome assembly and annotation	SRR7647071	61474533	18442359900	1405	QXTE00000000.1	98.9	561513	183	98573	2394
Divergence and plasticity shape adaptive potential in the Pacific oyster	SRR6063073	34796748	10439024400	1366
Platysternon megacephalum Raw sequence reads (both DNA and RNA) about genome assembly and annotation	SRR7647073	56665457	16999637100	1352	QXTE00000000.1	99	650546	169	85309	2198
Platysternon megacephalum Raw sequence reads (both DNA and RNA) about genome assembly and annotation	SRR7647074	53005923	15901776900	1242	QXTE00000000.1	99	560792	161	86728	20223
PacBio transcriptomic sequencing of Scapharca broughtonii infected with Ostreid herpesvirus 3	SRR11612692	18644503	4698414756	1157
Influence of seaweed on the microbiotic bacteria associated with the Pacific oyster and oyster transcriptom state after seaweed exposure.		122860578	36858173400	1153
Three-dimensional genome organization in Brassica rapa and Brassica oleracea	SRR8633026	105367668	30531658953	998
Crassostrea gigas microbiota and pathobiota	SRR9033545	2784782	1109920866	941
IFREMER 0-130	SRR10867631	23475727	3521359050	911
Shotgun metagenome sequencing from the Ocean Sampling Day (OSD) campaign June 2020	ERR4674711			872
Crassostrea gigas transcriptomic and proteomic data during metamorphosis	SRR11364042	30448813	4567321950	708
Raw sequence reads of Blood-microbiota of the Pacific oyster Crassostrea gigas	SRR7339967	1328748	578421429	702
Divergence and plasticity shape adaptive potential in the Pacific oyster	SRR6063278	64482294	11606812920	692
Transcriptome data of pea leaves	SRR15345837	104087569	31226270700	638
Raw sequence reads of Blood-microbiota of the Pacific oyster Crassostrea gigas	SRR7339971	1368958	625686993	605
IFREMER 0-72	SRR10867507	91023964	27473473708	592
Raw sequence reads of Blood-microbiota of the Pacific oyster Crassostrea gigas	SRR7339968	2501216	1180420205	587
AF11-T60-R3-RNAseq	SRR6679074	20490001	3073500150	583
IFREMER 0-85	SRR10867523	25184084	7522679466	574
Gill transcriptome sequencing of Crassostrea gigas after OsHV-1 challenge	SRR2002955	57850543	17348438978	572
Pituitary transcriptome study of broodiness and oviposition in Muscovy duck	SRR5930950	10891283	533672867	571
WGBS of cotton anthers under different temperature conditions	SRR10314680			560
Divergence and plasticity shape adaptive potential in the Pacific oyster	SRR6063357	95722355	17230023900	493
alga	SRR14246350	109687011	32906103300	493
Transcriptome of Crassostrea gigas infected by OsHV-1 at high temperatures	SRR11285553	29766058	4464908700	486
Raw sequence reads of Blood-microbiota of the Pacific oyster Crassostrea gigas	SRR7339953			434
AF11-T60-R3-RNAseq	SRR6679062	24804663	3720699450	409
Divergence and plasticity shape adaptive potential in the Pacific oyster	SRR6063228	101044482	18188006760	397
Divergence and plasticity shape adaptive potential in the Pacific oyster	SRR6063054	20268206	3648277080	389
Survey analysis of Calliptamus abbreviatus and Haplotropis brunneriana	SRR12016150	55889054	16766716200	388
Raw sequence reads of Blood-microbiota of the Pacific oyster Crassostrea gigas	SRR7339963	1880436	832163379	365
Raw sequence reads of Blood-microbiota of the Pacific oyster Crassostrea gigas	SRR7339970	1406677	643596221	362
alga	SRR14246532	136287369	40886210700	360
Survey analysis of Calliptamus abbreviatus and Haplotropis brunneriana	SRR12016151	54740617	16422185100	349
Gill transcriptome sequencing of Crassostrea gigas after OsHV-1 challenge	SRR2002864	1745832	452519631	332
IFREMER 0-126	SRR10867614	28669647	4300447050	329
Divergence and plasticity shape adaptive potential in the Pacific oyster	SRR6063358	51602428	9288437040	325
RNA-seq of Pacific oyster Crassostrea gigas under different developmental stages and stress treatments	SRR334252	8837485	627461435	324
S15_small	SRR8587800	14456565	1146854813	310
Gill transcriptome sequencing of Crassostrea gigas after OsHV-1 challenge	SRR2002935	2901091	749193679	308
RNA-seq of Pacific oyster Crassostrea gigas under different developmental stages and stress treatments	SRR334247	14312793	1016208303	305
Anadara sativa challgend	SRR10493304			294
IFREMER 0-80	SRR10867517	26417242	7886176412	284
Divergence and plasticity shape adaptive potential in the Pacific oyster	SRR6063167	92856414	16714154520	270
Divergence and plasticity shape adaptive potential in the Pacific oyster	SRR6062983	16077008	787773392	270
Stabilization of Pol II protein, orchestration of transcription cycles, and maintenance of enhancer landscape by general transcription regulator SPT5 [TT-seq]	SRR15730995 48485032 14545509600	113154715	33946414500	260
alga	SRR14246439	96733072	29019921600	259
o identify patient specific somatic variations in prostate cancer using Exome sequencing	SRR9847777	49494284	12472559568	255
Crassostrea gigas response to vibrios	SRR8551080	24745421	3711813150	246
Crassostrea gigas transcriptomic and proteomic data during metamorphosis	SRR11364037	23235351	3485302650	227
AF11-T60-R3-RNAseq	SRR6679069	24394224	3659133600	226
RNA-seq of Pacific oyster Crassostrea gigas under different developmental stages and stress treatments	SRR334254	9780172	694392212	224
Divergence and plasticity shape adaptive potential in the Pacific oyster	SRR6063070	51252426	15375727800	219
Transcriptomic sequencing of Haliotis diversicolor	SRR8439320	23490444	7047133200	209
Transcriptome of Crassostrea gigas infected by OsHV-1 at high temperatures	SRR11285541	28279136	4241870400	209
AF11-T60-R3-RNAseq	SRR6679063	27909299	4186394850	208
IFREMER 0-76	SRR10867512	40003015	12000904500	204
Vanilla planifolia cultivar:Daphna Genome sequencing	SRR12628848	60750605	18225181500	196
Platysternon megacephalum Raw sequence reads (both DNA and RNA) about genome assembly and annotation	SRR7647215	47394321	4834220742	194
Divergence and plasticity shape adaptive potential in the Pacific oyster	SRR6063252	82329680	14819342400	191
CRISPR/Cas9-mediated Gene Knockout Reveals a Guardian Role of NF-kB/RelA in Maintaining the Homeostasis of Human Vascular Cells	SRR7257252	16697325	4174331250	180
Influence of seaweed on the microbiotic bacteria associated with the Pacific oyster and oyster transcriptom state after seaweed exposure.		117205654	35161696200	180
Survey analysis of Calliptamus abbreviatus and Haplotropis brunneriana	SRR12019456	39466774	11840032200	175
Deep sequencing of samples from testis and ovary in Pacific oyster Crassostrea gigas	SRR1501077	117941710	35382513000	173
Transcriptome data of skin tissue in Capra hircus	SRR11743625	9485479	474211369	173
CRISPR/Cas9-mediated Gene Knockout Reveals a Guardian Role of NF-kB/RelA in Maintaining the Homeostasis of Human Vascular Cells	SRR7257240	14136229	3534057250	166
Gill transcriptome sequencing of Crassostrea gigas after OsHV-1 challenge	SRR2002934	2351636	571960889	165
CRISPR/Cas9-mediated Gene Knockout Reveals a Guardian Role of NF-kB/RelA in Maintaining the Homeostasis of Human Vascular Cells	SRR7257241	15774929	3943732250	163
Vanilla planifolia cultivar:Daphna Genome sequencing	SRR12628847	76403090	22920927000	158
Divergence and plasticity shape adaptive potential in the Pacific oyster	SRR6063035	10991571	538586979	157
CG5_poly	SRR8290643	43568347	4443971394	155
Vanilla planifolia cultivar:Daphna Genome sequencing	SRR12628846	47955853	14386755900	153
Homo sapiens Raw sequence reads	SRR17062146	2850244	145362444	150
CRISPR/Cas9-mediated Gene Knockout Reveals a Guardian Role of NF-kB/RelA in Maintaining the Homeostasis of Human Vascular Cells	SRR7257253	14271281	3567820250	147
Transcriptome of Crassostrea gigas infected by OsHV-1 at high temperatures	SRR11285538	25360261	3804039150	145
Divergence and plasticity shape adaptive potential in the Pacific oyster	SRR6063023	10964092	537240508	139
Anadara sativa challgend	SRR10493303			136
Raw sequence reads of Blood-microbiota of the Pacific oyster Crassostrea gigas	SRR7339991	1514598	679914425	133
IFREMER 0-81	SRR10867519	23187257	6923159584	132
